# Supplementary material
Source: PubMed Central journal article supplement (PMC4503364)
Supplement: NIHMS666625-supplement-1.pdf [file NIHMS666625-supplement-1.pdf]

## **Supplemental information**

Unbiased modifier screen reveals that signal strength determines the regulatory role murine TLR9 plays in autoantibody production

Robyn E. Mills, Viola C. Lam, Allison Tan, Nicole Cresalia, Nir Oksenberg, Julie Zikherman, Mark Anderson, Arthur Weiss, and Michelle L. Hermiston

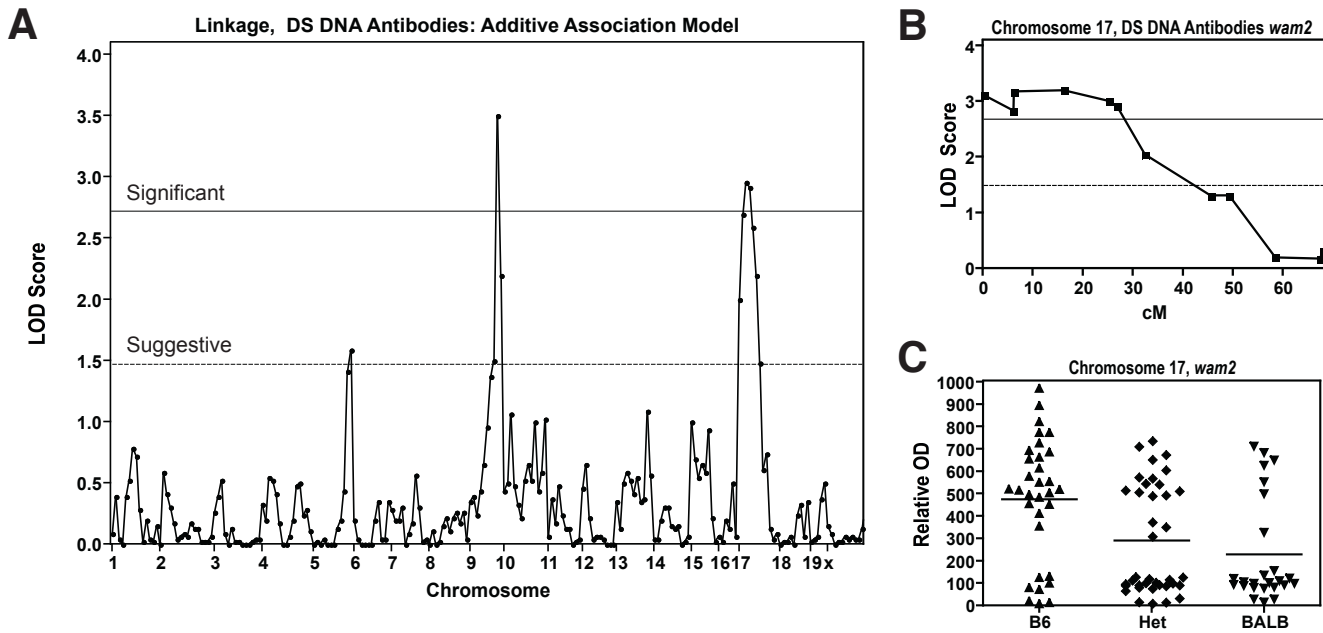

Figure S1. Additive QTL analysis of (B6 x BALB/c) CD45E613R F2 mice and susceptibility loci for ANA.

(A) Additive linkage analysis for anti-dsDNA IgG was performed on 94 F2 (B6 x BALB/c) CD45E613R mice. The solid line indicates the threshold for a significant LOD score and the dashed line indicates the threshold for a suggestive LOD score as based on permutation testing (1000 permutations) for each model. (B) Interval mapping of locus *Wam2* on chromosome 17. (C) Anti-dsDNA IgG relative OD of cohort segregated by *Wam2* genotype.

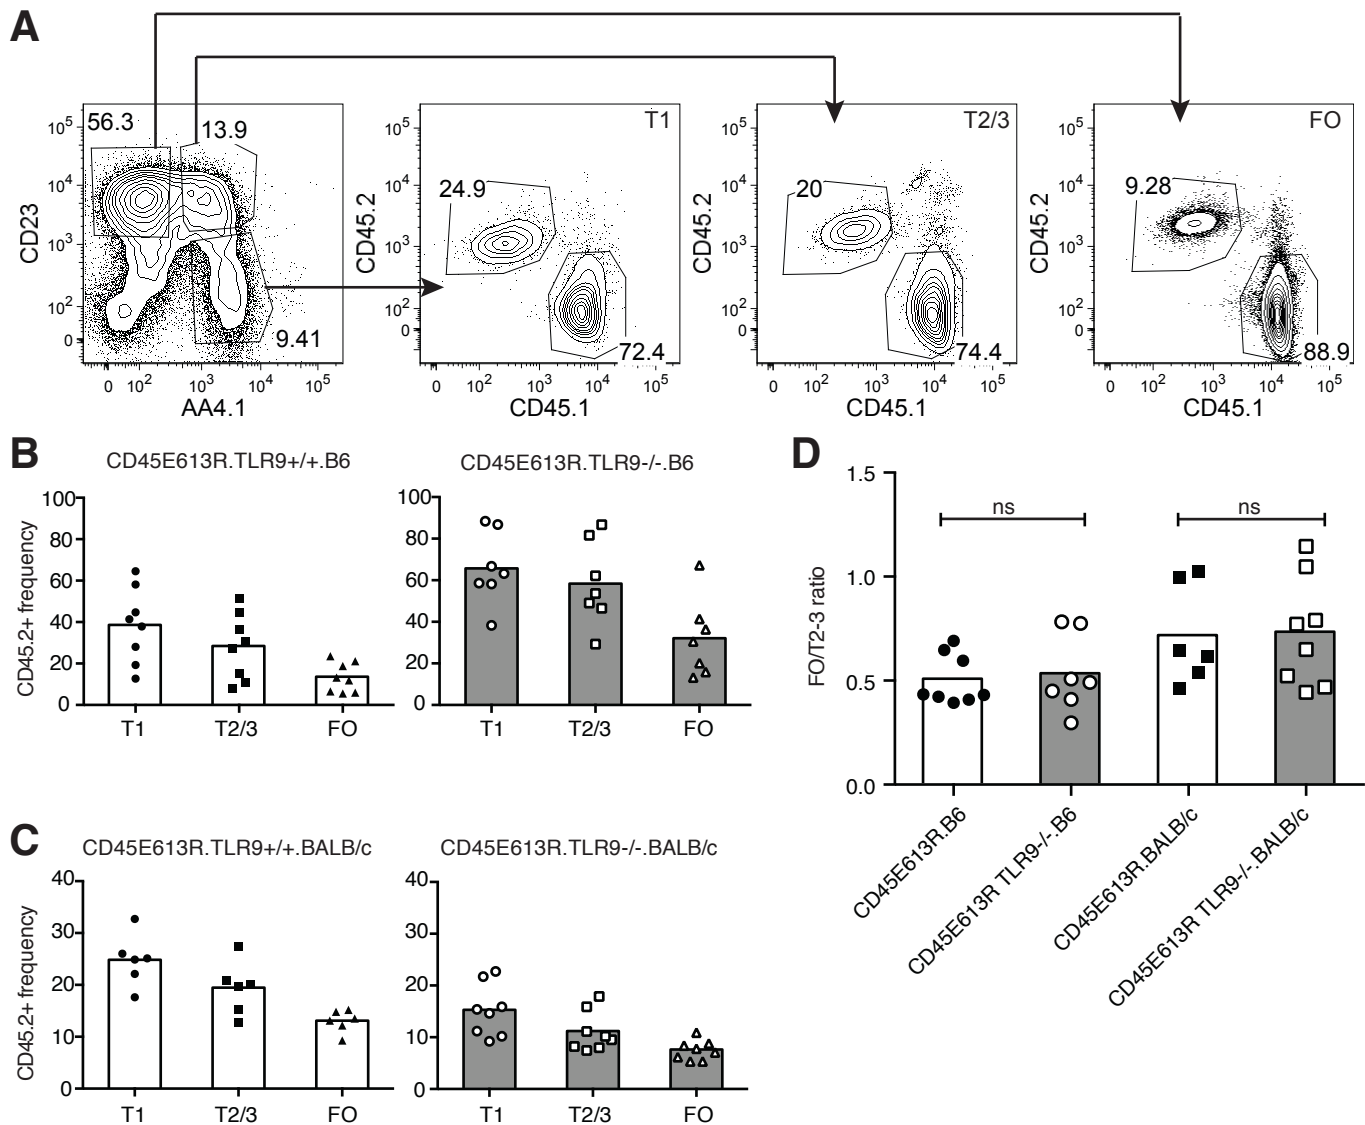

Figure S2. TLR9-independent negative regulation of CD45E613R B cell development in a competitive splenic microenvironment. Bone marrow chimeras were generated as described in Fig 7. (A) The CD45E613R proportion of developing B cell subsets in spleen was determined by CD45.2+ frequency of cells in the indicated compartments as identified by IgM/IgD staining of cells in the CD19+ gate in the spleen according to gating strategy shown. (B) CD45.2+ frequency of the indicated B cell compartment in spleens of chimeras of the indicated genotypes on the B6 background. (C) CD45.2+ frequency of indicated B cell compartment in spleen of chimeras of the indicated genotypes on the BALB/c background. (D) CD45.2+ frequency of follicular (FO) compartment was divided by CD45.2+ frequency of the T2/3 compartment for each chimera and plotted as ratio. Data in (B) are compiled from three independent experiments, and in (C) from three independent experiments.

**Supplemental Table 1\***  
**Genes of Immunologic Interest in *Wam1* on Chromosome 9**

| <b>Gene</b>                             | <b>Location (bp)</b> | <b>KO phenotype**</b>                                                                                                                                                                                           |
|-----------------------------------------|----------------------|-----------------------------------------------------------------------------------------------------------------------------------------------------------------------------------------------------------------|
| Bcl12a1a                                | 88754739             | Abnormal neutrophil morphology/development, increased apoptosis                                                                                                                                                 |
| Plscr1 (phospholipid scramblase 1)      | 92054019             | Decreased neutrophils, GCSF responsiveness, altered myeloid maturation                                                                                                                                          |
| Chst2 (carbohydrate sulfotransferase 2) | 95213460             | Decreased lymphocyte homing                                                                                                                                                                                     |
| Rbp1 (retinol binding protein 1)        | 98232313             | Marked expansion neutrophils                                                                                                                                                                                    |
| Pik3cb (PI3 kinase $\beta$ )            | 98847754             | Increased TNF $\alpha$ response to LPS                                                                                                                                                                          |
| Rab6b                                   | 102970101            | Ras family member; numerous immunologic abnormalities                                                                                                                                                           |
| Nphp3                                   | 103860949            | Focal interstitial inflammatory infiltrates kidneys; anemia                                                                                                                                                     |
| TLR9                                    | 106080699            | Decreased NK cells and total B cells; increased B1 cells; abnormal macrophages hyporesponsive to CpG; altered sensitivity to infection; altered cytokine production                                             |
| Mapkapk3                                | 107113028            | Decreased TNF cytokine production with LPS stimulation                                                                                                                                                          |
| Cacna2d                                 | 107257713            | Voltage dependent calcium channel subunit; neurologic abnormalities; altered thymic output                                                                                                                      |
| Rassf1                                  | 107409698            | Ras family protein; propensity to lymphomas                                                                                                                                                                     |
| Gnai2                                   | 107472231            | GTP binding protein; Colitis, increased cytokines, increased neutrophils, IgG, IgM, background dependent phenotype                                                                                              |
| Mst1r (Friend virus susceptibility 2)   | 107764990            | Also called c-met related tyrosine kinase and macrophage stimulating R1; <i>Known polymorphism</i> : Sensitive allele in BALB/c, resistant allele in B6. Hyperactive macrophages; increased acute inflammation. |
| Gpx1 (glutathione peroxidase 1)         | 108197368            | Increased inflammatory response, decreased body wt, abnormal platelets, colitis                                                                                                                                 |
| Lamb2 (laminin $\beta$ 2)               | 108338048            | Postnatal lethal, glomerularnephritis                                                                                                                                                                           |
| Impdh2                                  | 108418594            | Embryonic lethal; impaired T cell dev, proliferation, and cytotoxic T lymphocyte responses                                                                                                                      |
| Cdc25a                                  | 109732985            | Abnormal erythropoiesis, increased hematopoietic cell proliferation, <i>spontaneous mutation in BALB/c</i>                                                                                                      |
| CCR4                                    | 114339014            | Decreased TNF $\alpha$ production, IL-1 $\beta$ production; altered macrophage function                                                                                                                         |
| Tgf $\beta$ r2                          | 115932995            | Abnormal erythropoiesis, multiple inflammatory infiltrates; increased B1 cells, increased B cell proliferation, increased IgG and M                                                                             |

\* Searched for genes of hematopoietic and/or immunologic relevance between the SNPs flanking *Wam1* (Chromosome 9 bp 8721984-117595153; peak LOD for *Wam1* at SNP rs3088463, Chromosome 9 bp 103464705) using Ensembl ([http://www.ensembl.org/Mus\\_musculus/index.html](http://www.ensembl.org/Mus_musculus/index.html)).

\*\* See [www.informatics.jax.org](http://www.informatics.jax.org) for summary of phenotypes and references.

**Supplemental Table 2\***

**Select Genes of Immunologic Interest in *Wam2* on Chromosome 17 (in addition to MHC)**

| <b>Gene</b>                                                        | <b>Location bp</b> | <b>KO phenotype</b>                                                                                                                                                         |
|--------------------------------------------------------------------|--------------------|-----------------------------------------------------------------------------------------------------------------------------------------------------------------------------|
| Ube2i (ubiquitin-conjugating enzyme E2I)                           | 12221966           | Conjunctivitis, colitis                                                                                                                                                     |
| NKx2-5 (NK2 transcription)                                         | 14403747           | Decreased macrophage recruitment; acute and chronic lung inflammation                                                                                                       |
| Bak1 (BCL2-antagonist/killer 1)                                    | 15072317           | Abnormal homeostasis, splenic architecture; absent marginal zone B cells                                                                                                    |
| Ppard                                                              | 24277550           | Peroxisome proliferators activator receptor $\delta$ ; Renal and bile duct inflammation                                                                                     |
| Mapk14                                                             | 24988111           | Altered hematopoietic cell development and homeostasis                                                                                                                      |
| Cdkn1a (Cyclin-dependant kinase inhibitor)                         | 26566254           | Similar to human DiGeorge syndrome; thymic aplasia; abnormal hematopoiesis, anemia                                                                                          |
| Pim1 (Proviral integration site 1)                                 | 26747399           | Abnormal B cell development; increased bone marrow cell number, WBC count, splenomegaly; anti-DS DNA antibodies; arthritis, glomerulonephritis, autoimmunity susceptibility |
| Ubash3a (ubiquitin associated and SH3 domain containing protein A) | 27935419           | Homolog associated with human SLE, abnormal effector T cell function, LPD, increased immunoglobulins, abnorm cytokine secretion, increased ANAs                             |
| Cbs (cystathionine beta-synthase)                                  | 27960392           | Increased inflammatory response                                                                                                                                             |
| Abcg1 (ATP-binding cassette, sub-family G)                         | 28821439           | Susceptibility gene in human SLE; increased T cell proliferation; increased IgG and IgM; increased autoantibody level (dsDNA, anti-histone, ssDNA),                         |
| Tff2 (trefoil factor 2 (spasmolytic protein 1)                     | 30777799           | Abnormal macrophage physiology                                                                                                                                              |
| Tapbp (TAP binding protein)                                        | 30852327           | Colitis                                                                                                                                                                     |
| Rxrb (retinoid X receptor beta)                                    | 30868074           | Abnormal adaptive immunity, abnormal innate immunity                                                                                                                        |
| Psmb9                                                              | 30935131           | LPD; hyperresponsive T, B cells; increased susceptibility to EAE; increased cytokine secretion                                                                              |
| Psmb8                                                              | 31341351           | Extramedullary hematopoiesis, abnormal TNF physiology, autoimmune hepatitis                                                                                                 |
| Lta (lymphotoxin A)                                                | 33529932           | Abnormal T, dendritic cell function with abnormal antigen presentation via MHC class I                                                                                      |
| TNF                                                                | 33642306           | Increased immunoglobulins, WBC counts, LPD; Dermatitis                                                                                                                      |
| Ltb (lymphotoxin B)                                                | 33702886           | Abnormal antigen presentation via MHC class II                                                                                                                              |
| Pram1 (PML-RAR alpha-regulated adaptor molecule 1)                 | 33798022           | Defective T cell development, CTL function; abnormal dendritic cell antigen presentation due to defective intracellular transport of class I molecules                      |
| H2-M3                                                              | 34205918           | Histocompatibility 2, M region locus 3; Abnormal cytokine secretion                                                                                                         |
| MOG (Myelin oligodendrocyte glycoprotein)                          | 34224720           | Extramedullary hematopoiesis, LPD                                                                                                                                           |
| Ubd (ubiquitin D)                                                  | 34464437           | Abnormal complement cascade, impaired complement alternative pathway activation                                                                                             |
| MAP3K                                                              | 34802574           | Increased WBC, IgM, LPD                                                                                                                                                     |
| Sod2 (Superoxide dismutase 2)                                      | 34807442           | Susceptibility gene in human IBD, rheumatoid arthritis; Increased WBC count, enlarged spleen, abnormal T, B, and myeloid function.                                          |
| Dll1 (Delta-like 1)                                                | 34811218           | Increased WBC count, enlarged Spleen, absent LNs, increased IgM                                                                                                             |

\*Searched for genes of hematopoietic and/or immunologic relevance between the SNPs flanking *Wam2* (Chromosome 17 bp 12070979-36878315; peak LOD for *Wam2* at SNPs CEL-17-12736614 (bp 22133279) and rs3703275 (bp 36702283) as described for Supplemental Table 1.
